# Supplementary material for: A non-linear system patterns Rab5 GTPase on the membrane
Source: eLife. 2020 Jun 8;9:e54434. doi: 10.7554/eLife.54434 (PMC7279886; doi:10.7554/eLife.54434)
Supplement: Figure 2—source data 1. [file elife-54434-fig2-data1.xlsx]

## Sheet: Domains_in_time
190214-027-prenylated-Rab5-MMGTP_J05_T0016F002_Bead_1
dom num	t1	t2	t3	t4	t5	t6	t7	t8	t9	t10	t11	t12	t13	t14	t15
1	121.267	133.983	139.866	143.065	148.814	156.914	169.714	179.265	195.518	210.799	228.542	245.934	262.308	276.391	296.348
2	128.111	145.127	148.661	157.828	162.931	172.024	185.999	200.252	218.731	240.368	251.278	269.395	281.577	293.487	308.512
3	137.045	152.559	163.304	172.602	173.407	184.604	199.911	221.873	239.024	266.424	284.082	302.758	316.991	334.469	357.366
4	132.263	144.929	159.131	161.718	165.684	178.329	195.104	208.465	235.066	249.505	260.702	280.225	288.57	306.346	320.587
5	129.041	140.676	144.521	150.32	161.098	165.766	187.273	194.004	223.352	241.632	255.73	272.824	279.313	299.407	323.394
6	133.974	149.287	159.383	169.475	174.409	185.168	201.443	219.992	241.311	262.222	281.842	292.827	311.066	335.364	348.517
7	132.193	140.929	146.32	153.434	156.473	165.782	181.181	192.463	209.809	232.63	244.004	260.996	277.513	293.223	306.269
8	129.034	146.438	157.447	164.622	173.721	182.55	197.984	221.039	246.743	266.57	290.921	313.809	331.925	350.713	369.074
9	130.691	145.761	155.711	163.622	170.366	179.563	196.87	218.267	240.863	264.657	282.597	309.133	327.425	344.131	356.903
10	130.21	145.616	151.869	159.115	171.994	177.558	192.226	213.734	228.579	253.329	277.747	295.449	317.414	333.883	351.004
11	130.133	147.724	151.015	160.299	169.623	180.347	184.223	207.444	226.486	250.881	277.4	290.421	309.4	326.144	340.634
12	132.789	153.293	151.194	161.394	155.703	171.308	199.648	223.48	234.748	239.038	263.241	266.839	297.56	299.383	320.705
13	118.277	127.95	131.274	136.67	141.523	150.136	163.45	177.836	186.352	192.91	238.553	224.788	263.702	268.58	284.276
mean dom int	130.038	144.926	153.341	160.75	167.479	176.596	191.187	209.931	230.576	251.992	271.769	290.614	307.727	325.229	342.129
mean NO dom int	117.146	123.74	128.222	131.451	135.54	140.553	147.468	156.744	167.601	178.868	191.026	202.611	214.385	225.957	238.167
190214-027-prenylated-Rab5-MMGTP_J05_T0016F002_Bead_2
dom num	t1	t2	t3	t4	t5	t6	t7	t8	t9	t10	t11	t12	t13	t14	t15
1	147.312	189.36	201.161	198.622	218.837	235.087	230.716	242.23	266.606	293.948	308.204	345.814	339.41	360.509	352.018
2	128.022	142.279	151.124	154.562	161.496	167.489	180.029	173.843	201.953	213.843	226.91	244.007	253.568	258.115	278.474
mean dom int	144.259	180.746	193.129	191.947	208.721	222.604	220.907	231.152	256.333	281.181	294.176	327.517	322.026	341.614	335.462
mean NO dom int	116.036	120.029	122.041	123.097	125.093	126.836	128.978	131.97	135.194	138.675	141.308	144.914	147.432	150.383	152.482
190214-027-prenylated-Rab5-MMGTP_J05_T0016F002_Bead_3
dom num	t1	t2	t3	t4	t5	t6	t7	t8	t9	t10	t11	t12	t13	t14	t15
1	150.592	171.164	177.019	188.063	193.949	207.061	212.934	199.216	211.131	221.441	222.205	222.048	218.462	221.044	205.25
2	145.777	158.688	167.446	170.848	171.361	185.868	179.943	178.784	185.268	183.153	208.182	209.342	201.195	192.425	206.451
3	142.347	167.145	185.474	192.675	198.371	203.655	202.994	204.318	211.148	215.108	219.145	214.648	222.638	225.928	227.464
mean dom int	144.666	166.533	181.257	188.827	193.2	201.075	201.39	199.683	207.299	211.589	217.833	214.896	217.593	219.311	218.688
mean NO dom int	119.429	124.847	127.715	128.604	130.08	130.844	131.024	132.126	133.348	134.453	135.919	137.044	137.688	138.683	139.556
190214-027-prenylated-Rab5-MMGTP_J06_T0016F001_Bead_0
dom num	t1	t2	t3	t4	t5	t6	t7	t8	t9	t10	t11	t12	t13	t14	t15
1	472.401	738.52	937.409	1007.83	1131.65	1232.82	1295.49	1306.6	1368.47	1419.93	1390.66	1528.22	1609.25	1637.29	1706.29
2	470.028	713.101	913.873	1030.37	1132.88	1201.15	1261.69	1243.42	1275.7	1307.24	1285.86	1409.5	1470.77	1503.81	1575.65
3	442.818	689.931	835.681	945.594	1067.05	1100.48	1115.55	1097.7	1157.65	1177.14	1199.93	1232.96	1239.56	1252.41	1272.13
4	303.288	499.47	596.57	735.035	860.957	878.242	950.392	984.739	1003.5	1105.8	1205.35	1282.7	1292.33	1386.78	1466.37
5	501.343	827.025	959.653	1096.73	1296.95	1302.95	1374.91	1361.49	1364.6	1495.87	1495.93	1507.33	1669.05	1708.4	1647.9
mean dom int	434.994	687.619	841.832	951.847	1085.83	1131.66	1192.28	1193.68	1228.51	1297.05	1307.9	1386.14	1454.91	1497.2	1533.15
mean NO dom int	170.823	212.105	237.793	259.925	275.706	280.889	282.021	290.518	299.2	308.471	320.377	329.39	336.216	343.957	350.058
190214-027-prenylated-Rab5-MMGTP_J06_T0016F001_Bead_8
dom num	t1	t2	t3	t4	t5	t6	t7	t8	t9	t10	t11	t12	t13	t14	t15
1	303.49	402.935	457.656	442.466	564.353	520.454	603.486	556.102	578.627	608.154	599.748	676.412	659.039	659.039	724.85
2	272.827	368.759	410.395	478.667	484.779	523.394	559.072	577.079	575.633	555.953	578.39	617.753	642.803	642.803	671.455
3	357.801	414.325	470.634	531.146	517.706	513.433	520.037	543.656	554.283	580.673	577.954	588.399	557.517	557.517	640.112
4	248.372	347.764	400.8	431.029	446.406	473.971	500.036	512.797	496.627	498.085	550.154	573.489	562.337	562.337	569.404
5	248.73	356.313	385.844	435.393	481.081	506.725	499.091	502.988	497.166	547.332	564.917	612.584	628.943	628.943	630.901
6	213.387	305.261	338.871	361.949	434	472.313	392.679	445.439	445.851	395.159	454.522	486.636	510.205	510.205	530.577
mean dom int	275.843	368.148	409.677	452.691	489.171	502.668	512.64	522.166	522.885	544.054	561.308	599.871	601.734	601.734	631.533
mean NO dom int	153.768	177.311	192.176	204.35	210.319	212.857	214.422	219.917	223.985	230.535	235.641	241.237	244.904	244.904	252.7
190214-027-prenylated-Rab5-MMGTP_J06_T0016F001_Bead_9
dom num	t1	t2	t3	t4	t5	t6	t7	t8	t9	t10	t11	t12	t13	t14	t15
1	387.393	592.946	631.48	653.776	799.801	793.04	822.727	761.916	903.31	953.175	893.009	954.048	947.177	901.752	929.137
2	263.105	408.53	477.354	575.376	643.022	637.452	679.851	686.084	751.492	807.303	838.675	889.658	902.572	896.254	889.632
3	242.414	378.928	410.36	473.666	551.933	564.593	517.951	551.669	524.562	571.619	641.351	669.368	679.668	704.789	728.198
4	250.445	362.156	432.289	458.496	547.466	578.767	542.334	537.53	590.757	641.113	620.673	642.328	737.973	759.437	729.717
5	300.924	435.542	523.293	558.129	657.541	702.571	701.203	630.597	661.749	780.656	752.515	800.333	858.673	889.711	889.112
mean dom int	297.024	443.247	504.137	556.039	648.778	667.252	674.937	649.579	708.149	772.149	759.893	804.927	835.951	836.745	841.908
mean NO dom int	150.454	182.665	200.416	217.562	228.866	234.577	236.458	242.587	249.216	261.859	269.483	277.353	282.27	287.899	292.157
190214-027-prenylated-Rab5-MMGTP_J06_T0016F002_Bead_01
dom num	t1	t2	t3	t4	t5	t6	t7	t8	t9	t10	t11	t12	t13	t14	t15
1	178.149	242.565	258.109	269.602	275.257	270.588	275.247	284.746	292.334	310.991	314.224	308.166	345.413	322.6	339.876
2	151.505	172.738	189.182	188.96	183.016	188.402	190.247	184.579	195.105	201.328	214.272	219.038	247.154	228.34	268.779
3	140.803	145.392	155.634	155.581	169.479	164.378	154.925	162.352	154.306	168.393	173.739	194.019	243.431	224.635	274.116
4	179.777	208.387	238.035	238.448	239.13	249.274	255.447	273.049	268.017	282.115	281.468	311.286	311.059	327.447	325.878
5	162.197	188.798	186.027	213.538	188.031	189.884	194.566	196.8	209.349	209.253	219.583	230.073	239.498	256.252	263.962
6	171.88	212.66	224.288	220.81	216.66	227.998	221.43	223.884	226.302	232.544	245.549	263.861	296.782	266.735	307.826
7	170.666	205.487	227.205	233.959	240.166	229.859	248.311	255.427	245.051	272.976	275.554	282.334	304.804	288.205	305.044
8	152.712	193.883	194.75	206.221	218.042	247.639	221.55	225.18	231.373	233.911	226.939	271.686	248.45	251.191	257.152
mean dom int	166.537	199.441	215.668	221.277	221.482	225.413	228.927	237.011	236.07	250.072	253.719	269.318	287.342	278.183	296.77
mean NO dom int	133.572	144.263	148.164	150.183	150.986	151.39	153.271	154.382	157.459	158.59	159.633	160.724	161.497	163.581	164.659
190214-027-prenylated-Rab5-MMGTP_J06_T0016F002_Bead_4
dom num	t1	t2	t3	t4	t5	t6	t7	t8	t9	t10	t11	t12	t13	t14	t15
1	426.999	565.057	629.899	659.995	655.335	650.502	650.96	658.069	657.808	673.903	669.821	663.848	660.665	663.697	674.16
2	299.053	390.64	419.445	430.914	438.244	440.12	451.396	446.486	461.26	451.374	464.74	498.479	473.274	475.164	462.633
3	433.971	603.868	651.074	690.622	691.241	677.076	652.474	657.962	675.385	692.437	687.798	710.203	693.848	670.99	667.325
4	337.584	476.657	507.953	480.936	550.244	539.577	552.202	529.594	532.426	532.359	551.89	483.355	537.361	483.539	552.764
5	425.809	506.177	561.701	557.174	555.721	573.32	592.441	599.87	588.284	583.42	566.239	573.13	582.063	589.954	584.494
6	418.787	499.853	560.697	592.202	582.87	581.113	594.365	582.515	615.789	592.38	590.188	594.764	593.948	610.736	609.005
7	367.585	441.645	503.975	534.601	532.358	523.836	533.33	539.757	539.873	544.322	529.726	540.32	540.313	551.08	548.506
mean dom int	399.703	512.942	568.5	594.924	591.161	588.749	593.225	594.373	604.144	605.61	601.441	605.697	602.422	604.124	605.127
mean NO dom int	210.511	245.231	261.505	268.336	267.664	266.804	268.509	270.092	274.607	275.838	274.121	276.02	275.645	277.77	277.494
190214-027-prenylated-Rab5-MMGTP_J06_T0016F002_Bead_5
dom num	t1	t2	t3	t4	t5	t6	t7	t8	t9	t10	t11	t12	t13	t14	t15
1	295.579	376.24	496.839	531.661	582.596	611.569	607.201	626.467	650.278	678.608	666.26	674.687	655.803	683.688	691.334
2	223.245	484.405	370.05	420.354	532.583	594.467	587.483	552.794	602.743	611.841	614.387	623.701	617.37	652.242	666.106
3	276.104	342.261	460.67	475.87	557.711	568.777	578.832	564.941	585.602	603.612	605.542	603.592	603.409	624.709	614.118
4	355.424	501.547	576.357	610.96	633.754	622.645	583.252	627.882	633.627	666.651	662.296	693.882	673.086	690.57	687.433
5	278.261	365.955	449.044	529.621	609.459	621.433	595.711	620.477	652.075	653.831	650.5	702.727	664.918	694.446	693.146
6	288.006	350.2	452.942	504.694	555.844	550.176	520	546.846	583.256	584.715	582.774	630.288	615.965	625.163	618.13
7	365.787	467.89	614.608	664.776	717.481	709.667	700.205	703.262	745.642	765.277	759.431	780.15	777.728	771.561	777.986
8	291.08	249.405	456.937	494.121	577.963	555.771	601.521	608.598	604.874	631.102	626.851	608.282	602.12	595.86	628.234
mean dom int	319.56	412.495	525.441	569.495	625.815	625.339	615.259	625.855	656.295	674.207	669.572	690.483	680.594	687.207	692.063
mean NO dom int	204.956	269.16	288.887	307.31	310.531	306.314	307.486	311.285	323.9	329.446	330.091	333.375	333.474	335.811	335.215
190214-027-prenylated-Rab5-MMGTP_J06_T0016F002_Bead_7
dom num	t1	t2	t3	t4	t5	t6	t7	t8	t9	t10	t11	t12	t13	t14	t15
1	153.906	178.103	206.703	195.424	203.766	202.805	220.07	213.112	201.485	205.319	203.208	220.833	229.793	221.01	233.156
2	152.358	173.672	192.185	202.363	197.621	204.029	203.419	213.044	220.437	214.54	215.284	225.276	227.369	236.65	238.698
3	150.674	173.375	197.324	185.607	222.654	203.313	196.785	184.466	181.346	211.471	209.303	235.914	233.129	218.555	254.941
4	151.417	166.677	185.589	198.5	190.642	194.385	196.605	195.313	190.463	192.743	206.05	194.766	208.034	207.606	221.074
5	148.967	171.735	183.601	193.767	181.534	185.623	193.124	200.04	204.599	208.619	203.196	217.048	211.493	217.249	217.007
6	144.463	170.412	185.911	185.305	197.36	193.663	198.667	201.182	205.808	207.323	223.196	212.47	221.305	228.147	235.104
mean dom int	148.988	170.832	187.406	193.73	191.908	193.982	198.649	203.63	206.215	206.528	210.789	214.393	217.75	223.226	227.989
mean NO dom int	122.14	126.684	129.208	129.904	129.106	129.255	130.186	131.847	132.628	133.119	133.744	134.847	136.476	138.405	140.364
