# Supplementary material for: A non-linear system patterns Rab5 GTPase on the membrane
Source: eLife. 2020 Jun 8;9:e54434. doi: 10.7554/eLife.54434 (PMC7279886; doi:10.7554/eLife.54434)
Supplement: Table 2—source data 1. [file elife-54434-table2-data1.xlsx]

## Sheet: All_exp_MM
	All experiments with 10nM Rab5-GDI, 100 nM RbRx, 1uM GDI
	EE (1% PI(3)P)						RbRx titration experiment (100nM)						RbRx constructs						20191105 EE 1% Domains							ALL								std
#beads	#dom/bead	domain area	dom int	<dom int>	out dom int	#beads	#dom/bead	domain area	dom int	<dom int>	out dom int	#beads	#dom/bead	domain area	dom int	<dom int>	out dom int	#beads	#dom/bead	domain area	dom int	<dom int>	out dom int		#beads	#dom/bead	domain area	dom int	<dom int>	out dom int		Total number of domains:	449
40	3	2.45817	3699.86	3274.35	337.075	16	13	0.423559	2609.21	3101.78	1582.61	31	7	1.33665	428.819	368.09	156.695	9	2	1.91704	2705.45	2444.29	429.4		96	3	2.45817	3699.86	3274.35	337.075		Mean area:	1.74795	2.56733
	6	1.05229	2630.92	399.619	215.918		2	0.247364	2626.8	2650.29	327.515		3	1.04085	347.805	357.797	146.951		6	2.20943	2245.94	652.688	313.887			6	1.05229	2630.92	399.619	215.918		Mean intensity of domains:	1326.95	1026.96
	9	1.97477	3207.46	1254.62	520.558		5	0.568666	2382.05	1929.11	500.67		7	0.706839	375.245	308.091	176.117		6	2.50936	678.059	1051.99	286.521			9	1.97477	3207.46	1254.62	520.558		Mean intensity outside domains:	454.627	364.791
	7	2.02262	398.564	854.379	415.27		1	0.948777	2467.61	760.588	227.824		1	1.12107	374.862	1718.31	179.873		11	0.736322	560.946	1045.43	462.48			7	2.02262	398.564	854.379	415.27
	5	0.402056	397.577	1345.7	517.526		4	0.479397	2751.24	1186.63	311.361		4	1.81409	393.001	606.387	138.3		12	0.976821	632.31	594.046	313.089			5	0.402056	397.577	1345.7	517.526
	1	0.478945	380.765	597.815	231.621		1	1.4278	2506.87	3705.95	734.399		4	1.72765	321.208	759.726	148.171		3	2.72021	670.898	952.073	364.273			1	0.478945	380.765	597.815	231.621
	1	1.0478	389.799	855.071	213.077		2	1.22434	2689.83	4511.71	1079.31		16	0.547842	347.56	444.737	243.62		10	0.885569	625.74	1363.61	506.393			1	1.0478	389.799	855.071	213.077
	3	0.886597	373.486	1682.03	618.093		14	0.47874	3545.14	4247.79	2142.49		3	0.534938	342.48	304.426	179.459		12	2.46083	640.084	1590.74	730.344			3	0.886597	373.486	1682.03	618.093
	2	3.04603	417.278	1089.6	340.022		8	10.7063	3177.91	3338.98	1324.18		3	0.438383	326.571	384.947	168.778		6	1.12529	1309.38	2917.88	1032.87			2	3.04603	417.278	1089.6	340.022
	2	0.617732	1174.22	2059.83	244.645		7	0.51992	3028.72	3687.08	1553.25		7	1.05328	384.218	391.296	189.058			1.09315	1017.74					2	0.617732	1174.22	2059.83	244.645
	1	1.66935	1200	835.585	231.452		1	3.25523	3212.29	3172.75	385.322		17	0.351461	277.089	347.556	216.047			0.578943	955.637					1	1.66935	1200	835.585	231.452
	2	1.93403	1148.33	2431.22	245.767		2	0.298332	2909.34	1836.43	354.138		15	0.855723	302.525	264.017	161.815			0.768829	940.64					2	1.93403	1148.33	2431.22	245.767
	5	0.820777	1270.33	1171.14	541.398		12	2.26113	3103.59	2391.66	1242.08		12	0.495762	279.813	487.882	259.807			0.798793	993.916					5	0.820777	1270.33	1171.14	541.398
	4	0.2532	1167.14	1795.61	246.58		8	0.205429	2086.9	1070.53	362.105		5	0.605149	262.298	517.637	327.508			0.407798	997.942					4	0.2532	1167.14	1795.61	246.58
	5	1.29963	1605.54	1447.35	272.889		7	0.920694	2776	2289.52	805.878		9	1.15318	261.246	441.055	202.05			0.674171	988.157					5	1.29963	1605.54	1447.35	272.889
	2	0.662451	1286.65	473.859	169.897		3	0.330359	1948.14	3581.77	766.422		9	11.6426	325.929	668.415	330.993			1.60895	1230.71					2	0.662451	1286.65	473.859	169.897
	1	1.20542	1342.29	2540.32	277.822			0.614598	1764.53				5	0.954352	256.081	368.276	181.068			0.448753	1023.35					1	1.20542	1342.29	2540.32	277.822
	3	0.915237	1263.19	1122.02	278.836			0.542689	1711					1.39815	1718.31					0.727623	1078.96					3	0.915237	1263.19	1122.02	278.836
	3	0.603657	817.016	832.566	215.737			2.04201	2096.27					0.901631	575.81					0.876965	1014.56					3	0.603657	817.016	832.566	215.737
	2	0.880244	759.561	684.5	159.298			0.873883	1904.4					0.702377	631.134					1.14999	997.998					2	0.880244	759.561	684.5	159.298
	1	1.0223	835.613	1949.87	222.809			0.801352	759.865					0.410858	539.192					0.945691	933.581					1	1.0223	835.613	1949.87	222.809
	5	4.35328	876.991	972.375	338.893			0.370469	1192.47					1.79181	637.214					3.69328	1067.16					5	4.35328	876.991	972.375	338.893
	5	0.402056	889.792	912.35	347.956			0.670983	1100.34					0.758216	788.227					2.22093	983.669					5	0.402056	889.792	912.35	347.956
	5	0.363532	918.148	933.744	314.043			0.771747	1140.59					0.842851	906.155					1.75911	1192.38					5	0.363532	918.148	933.744	314.043
	1	0.408607	865.744	988.044	280.193			0.96208	1313.43					1.00276	726.204					0.720231	999.929					1	0.408607	865.744	988.044	280.193
	6	0.779372	1216.3	895.843	337.094			2.83549	3705.95					0.809517	631.061					0.564035	541.421					6	0.779372	1216.3	895.843	337.094
	1	0.321627	1509.39	2470.61	791.18			0.136327	3671.35					0.632306	402.487					0.500771	547.888					1	0.321627	1509.39	2470.61	791.18
	2	0.434694	1440.45	1543.39	525.079			3.07005	4553.65					2.03336	462.138					1.29091	606.905					2	0.434694	1440.45	1543.39	525.079
	4	0.662534	1337.65	1055.7	296.845			1.25692	3801.2					0.537084	372.194					2.54383	526.661					4	0.662534	1337.65	1055.7	296.845
	3	0.658947	1473.39	1335.19	526.495			0.738157	3425.8					6.72126	489.13					1.14161	598.183					3	0.658947	1473.39	1335.19	526.495
	7	1.69052	601.533	1527.62	611.275			2.23159	4608.38					0.616005	417.755					2.42804	583.774					7	1.69052	601.533	1527.62	611.275
	12	0.720206	855.071	1059.96	416.406			1.01989	3596.01					2.50545	465.049					0.889598	567.747					12	0.720206	855.071	1059.96	416.406
	1	2.78445	1742.45	3110.94	426.403			1.05995	4310.23					1.63987	387.4					0.748769	533.959					1	2.78445	1742.45	3110.94	426.403
	11	0.80182	1642.12	1782.31	1009.97			2.2101	4084.43					0.608699	483.123					7.44683	618.698					11	0.80182	1642.12	1782.31	1009.97
	1	1.73121	1613.79	1764.5	232.628			2.4116	4204.04					0.527048	343.93					4.33892	594.142					1	1.73121	1613.79	1764.5	232.628
	10	0.527695	1191.12	1085.7	466.75			3.92873	4192.5					0.90648	436.126					1.51003	574.044					10	0.527695	1191.12	1085.7	466.75
	4	0.679952	1073.86	2350.07	903.333			0.763694	4663.09					0.316265	440.913					1.81071	632.736					4	0.679952	1073.86	2350.07	903.333
	10	0.317112	1936.8	995.406	410.01			1.39805	4560.15					0.442817	420.877					0.659274	796.102					10	0.317112	1936.8	995.406	410.01
	2	0.476771	2365.21	2649.05	558.963			3.19801	4108.86					1.39085	401.27					0.858651	1036.23					2	0.476771	2365.21	2649.05	558.963
	6	5.50526	854.432	1046.27	424.528			0.682762	4221.89					2.29144	500.347					1.18624	944.784					6	5.50526	854.432	1046.27	424.528
		0.82409	2212.53					1.36609	3878.82					0.760987	455.548					1.53285	1462.62					13	0.82409	2212.53	3101.78	1582.61
		1.2832	2614.07					16.729	4228.12					1.98527	375.81					0.527695	1190.04					2	1.2832	2614.07	2650.29	327.515
		1.09025	1042.88					0.543984	3043.61					0.648846	266.679					3.83163	1285.31					5	1.09025	1042.88	1929.11	500.67
		0.736636	1146.89					0.427146	3266.87					2.58579	296.142					2.55551	1074.24					1	0.736636	1146.89	760.588	227.824
		0.752145	1054.87					2.07737	3285.47					13.4468	308.966					0.954014	1194.71					4	0.752145	1054.87	1186.63	311.361
		7.4402	1201.68					1.41361	3881.1					0.702622	321.637					0.814407	1272.64					1	7.4402	1201.68	3705.95	734.399
		0.970686	1509.11					0.546153	3096.54					2.36287	411.658					7.33396	1415.5					2	0.970686	1509.11	4511.71	1079.31
		0.840234	1652.09					1.22788	3389.69					0.850704	371.188					0.877246	1326.7					14	0.840234	1652.09	4247.79	2142.49
		0.791769	2022.38					2.32387	3530.77					0.364256	342.22					0.2532	1172.6					8	0.791769	2022.38	3338.98	1324.18
		2.66138	1706.62					0.709914	3125.23					1.92246	450.663					4.49351	1419.32					7	2.66138	1706.62	3687.08	1553.25
		0.885159	2069.82					0.405963	3230.5					1.50836	421.104					0.334184	1483.39					1	0.885159	2069.82	3172.75	385.322
		0.728065	1281.64					14.2584	3916.47					2.36208	412.481					0.806187	1432.03					2	0.728065	1281.64	1836.43	354.138
		0.342413	1244.72					9.75291	3469.24					0.884071	356.47					1.48062	1490.46					12	0.342413	1244.72	2391.66	1242.08
		0.645147	1527.22					3.93419	4040.96					3.08361	358.959					0.532614	1609.38					8	0.645147	1527.22	1070.53	362.105
		1.37289	1682.95					0.944516	3667.23					1.1616	361.85					1.53067	1627.16					7	1.37289	1682.95	2289.52	805.878
		2.12259	1372.27					20.1507	3611.18					0.491471	311.097					0.499019	1650.67					3	2.12259	1372.27	3581.77	766.422
		0.528246	398.918					0.873034	3977.74					0.621848	314.95					0.960535	1981.35					7	0.528246	398.918	368.09	156.695
		0.93577	516.163					1.08015	3303.35					1.78428	362.176					1.08251	1664.7					3	0.93577	516.163	357.797	146.951
		2.39014	2664.61					1.16056	1888.02					1.7435	367.541					6.93705	1411.9					7	2.39014	2664.61	308.091	176.117
		0.654362	1342.11					0.340912	1982.63					0.609353	301.613					1.07176	1442.01					1	0.654362	1342.11	1718.31	179.873
		1.93295	1110.33					1.1109	2231.09					1.97582	371.768					0.957657	1926.38					4	1.93295	1110.33	606.387	138.3
		0.758559	1031.77					0.610853	2401.57					1.43266	345.361					0.266489	1564.37					4	0.758559	1031.77	759.726	148.171
		0.872026	742.175					1.02077	2529.83					0.47874	334.909					0.864757	2830.76					16	0.872026	742.175	444.737	243.62
		0.43366	717.506					4.27943	2742.62					12.2112	349.215					0.841985	2476.58					3	0.43366	717.506	304.426	179.459
		0.741075	1058.56					0.750832	2352.93					0.702639	355.9					0.761456	2859.81					3	0.741075	1058.56	384.947	168.778
		0.839435	708.425					1.15766	2477.87					0.319039	348.016					1.7041	2875.16					7	0.839435	708.425	391.296	189.058
		0.532248	581.007					3.90912	2056.13					0.286759	405.126					2.67339	2883.07					17	0.532248	581.007	347.556	216.047
		1.02386	2070.02					0.800257	2309.6					0.5843	328.542					4.17936	3222.16					15	1.02386	2070.02	264.017	161.815
		1.02386	1132.21					4.85239	2450.28					0.78754	388.552											12	1.02386	1132.21	487.882	259.807
		1.36084	858.381					0.887994	2608.45					1.64244	355.599											5	1.36084	858.381	517.637	327.508
		1.83051	966.824					0.409526	2267.45					0.651687	358.442											9	1.83051	966.824	441.055	202.05
		0.802604	1026.82					0.547488	1956.42					0.38784	323.051											9	0.802604	1026.82	668.415	330.993
		0.527695	1036.23					0.445322	1131.03					1.74373	290.496											5	0.527695	1036.23	368.276	181.068
		0.547279	808.698					0.820813	956.964					0.641709	305.911											2	0.547279	808.698	2444.29	429.4
		2.50646	1052.61					0.864757	1323.29					0.702622	273.27											6	2.50646	1052.61	652.688	313.887
		0.617164	935.992					1.0449	1139.96					0.402056	245.251											6	0.617164	935.992	1051.99	286.521
		0.901843	858.919					0.545685	935.406					0.638999	277.997											11	0.901843	858.919	1045.43	462.48
		1.85845	857.285					0.670983	923.905					2.85232	250.665											12	1.85845	857.285	594.046	313.089
		2.92098	1028.35					0.522137	1164.51					1.76628	272.959											3	2.92098	1028.35	952.073	364.273
		0.468921	898.661					0.648526	1127.52					2.81403	260.368											10	0.468921	898.661	1363.61	506.393
		0.781446	786.243					0.805401	1995.88					1.84444	273.713											12	0.781446	786.243	1590.74	730.344
		0.57825	882.171					0.538576	1937.3					5.38184	258.217											6	0.57825	882.171	2917.88	1032.87
		0.478945	861.992					0.47799	1909.15					2.62268	266.437												0.478945	861.992
		1.55293	988.044					3.52034	2733.43					0.546903	261.844												1.55293	988.044
		0.47676	859.587					0.682058	1882.9					0.620283	257.941												0.47676	859.587
		1.74151	775.444					0.518574	1900.62					0.250257	268.458												1.74151	775.444
		0.375337	944.07					3.052	2329.52					0.412376	254.186												0.375337	944.07
		0.366077	839.221					1.2967	3564.12					1.05915	501.391												0.366077	839.221
		2.64121	947.49					0.709594	4289.2					0.915651	427.989												2.64121	947.49
		0.423496	880.596					0.967965	3088.06					0.888969	498.625												0.423496	880.596
		0.702622	2117.69											0.941963	493.706												0.702622	2117.69
		1.28073	1856.79											1.03876	485.019												1.28073	1856.79
		1.36692	1329.99											0.866487	445.354												1.36692	1329.99
		0.382059	950.534											1.02421	407.23												0.382059	950.534
		0.807679	853.6											0.510169	467.918												0.807679	853.6
		1.51738	1211.54											6.72044	537.137												1.51738	1211.54
		0.811286	1026.78											6.36578	509.587												0.811286	1026.78
		2.8125	1375.75											1.96116	414.435												2.8125	1375.75
		1.5305	1387.64											1.13529	436.652												1.5305	1387.64
		2.92273	1289.8											0.836366	440.227												2.92273	1289.8
		0.664379	1266.65											1.0248	469.478												0.664379	1266.65
		1.26767	1362.68											9.77472	501.293												1.26767	1362.68
		0.730677	1501.43											1.0712	451.313												0.730677	1501.43
		0.324545	1375.34											0.648737	459.647												0.324545	1375.34
		0.453716	1542.56											0.379538	416.064												0.453716	1542.56
		2.98373	1569.72											0.492039	380.874												2.98373	1569.72
		2.50238	1676.24											1.42811	413.116												2.50238	1676.24
		0.361275	948.448											5.44955	478.704												0.361275	948.448
		3.29642	1086.11											7.17057	437.121												3.29642	1086.11
		1.04726	995.627											0.310461	383.962												1.04726	995.627
		0.691858	908.604											1.03177	481.913												0.691858	908.604
		0.70776	1161.37											0.846899	398.198												0.70776	1161.37
		0.903135	1106.75											0.697685	408.891												0.903135	1106.75
		1.03722	1054.42											16.8295	725.799												1.03722	1054.42
		0.611507	991.058											0.72326	598.868												0.611507	991.058
		0.744558	1029.03											8.18834	644.641												0.744558	1029.03
		1.4967	958.207											0.644039	562.314												1.4967	958.207
		1.00974	955.515											1.17159	578.581												1.00974	955.515
		0.375337	980.969											1.3419	624.38												0.375337	980.969
		0.839118	3095.58											0.408607	599.373												0.839118	3095.58
		0.333676	1516.27											2.45109	612.008												0.333676	1516.27
		1.16449	1679.63											2.9921	624.89												1.16449	1679.63
		1.88929	1434.24											0.462962	293.96												1.88929	1434.24
		2.2446	1696.95											1.71214	322.47												2.2446	1696.95
		2.87118	1624.91											1.57159	316.909												2.87118	1624.91
		1.36084	1757.79											3.29429	285.594												1.36084	1757.79
		6.30015	1634.88											23.8238	388.893												6.30015	1634.88
		9.53713	1893.26																								9.53713	1893.26
		11.6706	1976.05																								11.6706	1976.05
		3.32809	1614.78																								3.32809	1614.78
		0.987232	1644.78																								0.987232	1644.78
		1.12807	1899.48																								1.12807	1899.48
		0.518547	1001.42																								0.518547	1001.42
		2.31405	1153.53																								2.31405	1153.53
		0.383569	1149.37																								0.383569	1149.37
		4.90987	1146.91																								4.90987	1146.91
		0.666331	1027.44																								0.666331	1027.44
		1.25548	892.086																								1.25548	892.086
		0.678548	1083.63																								0.678548	1083.63
		0.479491	943.836																								0.479491	943.836
		0.888472	1015.68																								0.888472	1015.68
		0.741476	1049.68																								0.741476	1049.68
		1.22556	1920.23																								1.22556	1920.23
		5.29982	2491.05																								5.29982	2491.05
		1.07449	2649.03																								1.07449	2649.03
		1.09681	2004.76																								1.09681	2004.76
		4.79351	1066.63																								4.79351	1066.63
		0.479397	894.585																								0.479397	894.585
		2.34389	1044.48																								2.34389	1044.48
		1.84488	947.92																								1.84488	947.92
		1.78446	1062.66																								1.78446	1062.66
		0.542974	1034.07																								0.542974	1034.07
		0.554036	988.207																								0.554036	988.207
		1.1298	778.595																								1.1298	778.595
		2.36887	934.58																								2.36887	934.58
		1.27551	1008.53																								1.27551	1008.53
		2.37703	2522.03																								2.37703	2522.03
		0.730677	2086.5																								0.730677	2086.5
		0.504124	1047.35																								0.504124	1047.35
		0.732534	1040.37																								0.732534	1040.37
		0.597798	1015.16																								0.597798	1015.16
		0.730677	1034.01																								0.730677	1034.01
		1.05774	1063.52																								1.05774	1063.52
		0.498586	1051.98																								0.498586	1051.98
																											0.423559	2609.21
																											0.247364	2626.8
																											0.568666	2382.05
																											0.948777	2467.61
																											0.479397	2751.24
																											1.4278	2506.87
																											1.22434	2689.83
																											0.47874	3545.14
																											10.7063	3177.91
																											0.51992	3028.72
																											3.25523	3212.29
																											0.298332	2909.34
																											2.26113	3103.59
																											0.205429	2086.9
																											0.920694	2776
																											0.330359	1948.14
																											0.614598	1764.53
																											0.542689	1711
																											2.04201	2096.27
																											0.873883	1904.4
																											0.801352	759.865
																											0.370469	1192.47
																											0.670983	1100.34
																											0.771747	1140.59
																											0.96208	1313.43
																											2.83549	3705.95
																											0.136327	3671.35
																											3.07005	4553.65
																											1.25692	3801.2
																											0.738157	3425.8
																											2.23159	4608.38
																											1.01989	3596.01
																											1.05995	4310.23
																											2.2101	4084.43
																											2.4116	4204.04
																											3.92873	4192.5
																											0.763694	4663.09
																											1.39805	4560.15
																											3.19801	4108.86
																											0.682762	4221.89
																											1.36609	3878.82
																											16.729	4228.12
																											0.543984	3043.61
																											0.427146	3266.87
																											2.07737	3285.47
																											1.41361	3881.1
																											0.546153	3096.54
																											1.22788	3389.69
																											2.32387	3530.77
																											0.709914	3125.23
																											0.405963	3230.5
																											14.2584	3916.47
																											9.75291	3469.24
																											3.93419	4040.96
																											0.944516	3667.23
																											20.1507	3611.18
																											0.873034	3977.74
																											1.08015	3303.35
																											1.16056	1888.02
																											0.340912	1982.63
																											1.1109	2231.09
																											0.610853	2401.57
																											1.02077	2529.83
																											4.27943	2742.62
																											0.750832	2352.93
																											1.15766	2477.87
																											3.90912	2056.13
																											0.800257	2309.6
																											4.85239	2450.28
																											0.887994	2608.45
																											0.409526	2267.45
																											0.547488	1956.42
																											0.445322	1131.03
																											0.820813	956.964
																											0.864757	1323.29
																											1.0449	1139.96
																											0.545685	935.406
																											0.670983	923.905
																											0.522137	1164.51
																											0.648526	1127.52
																											0.805401	1995.88
																											0.538576	1937.3
																											0.47799	1909.15
																											3.52034	2733.43
																											0.682058	1882.9
																											0.518574	1900.62
																											3.052	2329.52
																											1.2967	3564.12
																											0.709594	4289.2
																											0.967965	3088.06
																											1.33665	428.819
																											1.04085	347.805
																											0.706839	375.245
																											1.12107	374.862
																											1.81409	393.001
																											1.72765	321.208
																											0.547842	347.56
																											0.534938	342.48
																											0.438383	326.571
																											1.05328	384.218
																											0.351461	277.089
																											0.855723	302.525
																											0.495762	279.813
																											0.605149	262.298
																											1.15318	261.246
																											11.6426	325.929
																											0.954352	256.081
																											1.39815	1718.31
																											0.901631	575.81
																											0.702377	631.134
																											0.410858	539.192
																											1.79181	637.214
																											0.758216	788.227
																											0.842851	906.155
																											1.00276	726.204
																											0.809517	631.061
																											0.632306	402.487
																											2.03336	462.138
																											0.537084	372.194
																											6.72126	489.13
																											0.616005	417.755
																											2.50545	465.049
																											1.63987	387.4
																											0.608699	483.123
																											0.527048	343.93
																											0.90648	436.126
																											0.316265	440.913
																											0.442817	420.877
																											1.39085	401.27
																											2.29144	500.347
																											0.760987	455.548
																											1.98527	375.81
																											0.648846	266.679
																											2.58579	296.142
																											13.4468	308.966
																											0.702622	321.637
																											2.36287	411.658
																											0.850704	371.188
																											0.364256	342.22
																											1.92246	450.663
																											1.50836	421.104
																											2.36208	412.481
																											0.884071	356.47
																											3.08361	358.959
																											1.1616	361.85
																											0.491471	311.097
																											0.621848	314.95
																											1.78428	362.176
																											1.7435	367.541
																											0.609353	301.613
																											1.97582	371.768
																											1.43266	345.361
																											0.47874	334.909
																											12.2112	349.215
																											0.702639	355.9
																											0.319039	348.016
																											0.286759	405.126
																											0.5843	328.542
																											0.78754	388.552
																											1.64244	355.599
																											0.651687	358.442
																											0.38784	323.051
																											1.74373	290.496
																											0.641709	305.911
																											0.702622	273.27
																											0.402056	245.251
																											0.638999	277.997
																											2.85232	250.665
																											1.76628	272.959
																											2.81403	260.368
																											1.84444	273.713
																											5.38184	258.217
																											2.62268	266.437
																											0.546903	261.844
																											0.620283	257.941
																											0.250257	268.458
																											0.412376	254.186
																											1.05915	501.391
																											0.915651	427.989
																											0.888969	498.625
																											0.941963	493.706
																											1.03876	485.019
																											0.866487	445.354
																											1.02421	407.23
																											0.510169	467.918
																											6.72044	537.137
																											6.36578	509.587
																											1.96116	414.435
																											1.13529	436.652
																											0.836366	440.227
																											1.0248	469.478
																											9.77472	501.293
																											1.0712	451.313
																											0.648737	459.647
																											0.379538	416.064
																											0.492039	380.874
																											1.42811	413.116
																											5.44955	478.704
																											7.17057	437.121
																											0.310461	383.962
																											1.03177	481.913
																											0.846899	398.198
																											0.697685	408.891
																											16.8295	725.799
																											0.72326	598.868
																											8.18834	644.641
																											0.644039	562.314
																											1.17159	578.581
																											1.3419	624.38
																											0.408607	599.373
																											2.45109	612.008
																											2.9921	624.89
																											0.462962	293.96
																											1.71214	322.47
																											1.57159	316.909
																											3.29429	285.594
																											23.8238	388.893
																											1.91704	2705.45
																											2.20943	2245.94
																											2.50936	678.059
																											0.736322	560.946
																											0.976821	632.31
																											2.72021	670.898
																											0.885569	625.74
																											2.46083	640.084
																											1.12529	1309.38
																											1.09315	1017.74
																											0.578943	955.637
																											0.768829	940.64
																											0.798793	993.916
																											0.407798	997.942
																											0.674171	988.157
																											1.60895	1230.71
																											0.448753	1023.35
																											0.727623	1078.96
																											0.876965	1014.56
																											1.14999	997.998
																											0.945691	933.581
																											3.69328	1067.16
																											2.22093	983.669
																											1.75911	1192.38
																											0.720231	999.929
																											0.564035	541.421
																											0.500771	547.888
																											1.29091	606.905
																											2.54383	526.661
																											1.14161	598.183
																											2.42804	583.774
																											0.889598	567.747
																											0.748769	533.959
																											7.44683	618.698
																											4.33892	594.142
																											1.51003	574.044
																											1.81071	632.736
																											0.659274	796.102
																											0.858651	1036.23
																											1.18624	944.784
																											1.53285	1462.62
																											0.527695	1190.04
																											3.83163	1285.31
																											2.55551	1074.24
																											0.954014	1194.71
																											0.814407	1272.64
																											7.33396	1415.5
																											0.877246	1326.7
																											0.2532	1172.6
																											4.49351	1419.32
																											0.334184	1483.39
																											0.806187	1432.03
																											1.48062	1490.46
																											0.532614	1609.38
																											1.53067	1627.16
																											0.499019	1650.67
																											0.960535	1981.35
																											1.08251	1664.7
																											6.93705	1411.9
																											1.07176	1442.01
																											0.957657	1926.38
																											0.266489	1564.37
																											0.864757	2830.76
																											0.841985	2476.58
																											0.761456	2859.81
																											1.7041	2875.16
																											2.67339	2883.07
																											4.17936	3222.16

## Sheet: Domain_area_evaluation
EE (1% PI(3)P)				RbRx titration 100nM				RbRx full-length				20191105 EE 1% Domains				ALL experiments
domain area	mean	median		domain area	mean	median		domain area	mean	median		domain area	mean	median		domain area	mean	median
2.45817	1.42477	0.885878		0.423559	1.97359	0.880938		1.33665	2.05476	0.954352		1.91704	1.65575	1.02429		2.45817	1.74795	0.920694
1.05229				0.247364				1.04085				2.20943				1.05229
1.97477	stdleft	1quartile		0.568666	stdleft	1quartile		0.706839	stdleft	1quartile		2.50936	stdleft	1quartile		1.97477	stdleft	1quartile
2.02262	0.73312	0.615749		0.948777	1.2635	0.546487		1.12107	1.2256	0.621065		0.736322	0.85881	0.758284		2.02262	1.0003	0.620283
0.402056				0.479397				1.81409				0.976821				0.402056
0.478945	stdright	3quartile		1.4278	stdright	3quartile		1.72765	stdright	3quartile		2.72021	stdright	3quartile		0.478945	stdright	3quartile
1.0478	2.6695	1.70069		1.22434	6.2183	1.88846		0.547842	7.0885	1.80295		0.885569	2.5245	1.99014		1.0478	4.7433	1.79181
0.886597				0.47874				0.534938				2.46083				0.886597
3.04603				10.7063				0.438383				1.12529				3.04603
0.617732				0.51992				1.05328				1.09315				0.617732
1.66935				3.25523				0.351461				0.578943				1.66935
1.93403				0.298332				0.855723				0.768829				1.93403
0.820777				2.26113				0.495762				0.798793				0.820777
0.2532				0.205429				0.605149				0.407798				0.2532
1.29963				0.920694				1.15318				0.674171				1.29963
0.662451				0.330359				11.6426				1.60895				0.662451
1.20542				0.614598				0.954352				0.448753				1.20542
0.915237				0.542689				1.39815				0.727623				0.915237
0.603657				2.04201				0.901631				0.876965				0.603657
0.880244				0.873883				0.702377				1.14999				0.880244
1.0223				0.801352				0.410858				0.945691				1.0223
4.35328				0.370469				1.79181				3.69328				4.35328
0.402056				0.670983				0.758216				2.22093				0.402056
0.363532				0.771747				0.842851				1.75911				0.363532
0.408607				0.96208				1.00276				0.720231				0.408607
0.779372				2.83549				0.809517				0.564035				0.779372
0.321627				0.136327				0.632306				0.500771				0.321627
0.434694				3.07005				2.03336				1.29091				0.434694
0.662534				1.25692				0.537084				2.54383				0.662534
0.658947				0.738157				6.72126				1.14161				0.658947
1.69052				2.23159				0.616005				2.42804				1.69052
0.720206				1.01989				2.50545				0.889598				0.720206
2.78445				1.05995				1.63987				0.748769				2.78445
0.80182				2.2101				0.608699				7.44683				0.80182
1.73121				2.4116				0.527048				4.33892				1.73121
0.527695				3.92873				0.90648				1.51003				0.527695
0.679952				0.763694				0.316265				1.81071				0.679952
0.317112				1.39805				0.442817				0.659274				0.317112
0.476771				3.19801				1.39085				0.858651				0.476771
5.50526				0.682762				2.29144				1.18624				5.50526
0.82409				1.36609				0.760987				1.53285				0.82409
1.2832				16.729				1.98527				0.527695				1.2832
1.09025				0.543984				0.648846				3.83163				1.09025
0.736636				0.427146				2.58579				2.55551				0.736636
0.752145				2.07737				13.4468				0.954014				0.752145
7.4402				1.41361				0.702622				0.814407				7.4402
0.970686				0.546153				2.36287				7.33396				0.970686
0.840234				1.22788				0.850704				0.877246				0.840234
0.791769				2.32387				0.364256				0.2532				0.791769
2.66138				0.709914				1.92246				4.49351				2.66138
0.885159				0.405963				1.50836				0.334184				0.885159
0.728065				14.2584				2.36208				0.806187				0.728065
0.342413				9.75291				0.884071				1.48062				0.342413
0.645147				3.93419				3.08361				0.532614				0.645147
1.37289				0.944516				1.1616				1.53067				1.37289
2.12259				20.1507				0.491471				0.499019				2.12259
0.528246				0.873034				0.621848				0.960535				0.528246
0.93577				1.08015				1.78428				1.08251				0.93577
2.39014				1.16056				1.7435				6.93705				2.39014
0.654362				0.340912				0.609353				1.07176				0.654362
1.93295				1.1109				1.97582				0.957657				1.93295
0.758559				0.610853				1.43266				0.266489				0.758559
0.872026				1.02077				0.47874				0.864757				0.872026
0.43366				4.27943				12.2112				0.841985				0.43366
0.741075				0.750832				0.702639				0.761456				0.741075
0.839435				1.15766				0.319039				1.7041				0.839435
0.532248				3.90912				0.286759				2.67339				0.532248
1.02386				0.800257				0.5843				4.17936				1.02386
1.02386				4.85239				0.78754								1.02386
1.36084				0.887994				1.64244								1.36084
1.83051				0.409526				0.651687								1.83051
0.802604				0.547488				0.38784								0.802604
0.527695				0.445322				1.74373								0.527695
0.547279				0.820813				0.641709								0.547279
2.50646				0.864757				0.702622								2.50646
0.617164				1.0449				0.402056								0.617164
0.901843				0.545685				0.638999								0.901843
1.85845				0.670983				2.85232								1.85845
2.92098				0.522137				1.76628								2.92098
0.468921				0.648526				2.81403								0.468921
0.781446				0.805401				1.84444								0.781446
0.57825				0.538576				5.38184								0.57825
0.478945				0.47799				2.62268								0.478945
1.55293				3.52034				0.546903								1.55293
0.47676				0.682058				0.620283								0.47676
1.74151				0.518574				0.250257								1.74151
0.375337				3.052				0.412376								0.375337
0.366077				1.2967				1.05915								0.366077
2.64121				0.709594				0.915651								2.64121
0.423496				0.967965				0.888969								0.423496
0.702622								0.941963								0.702622
1.28073								1.03876								1.28073
1.36692								0.866487								1.36692
0.382059								1.02421								0.382059
0.807679								0.510169								0.807679
1.51738								6.72044								1.51738
0.811286								6.36578								0.811286
2.8125								1.96116								2.8125
1.5305								1.13529								1.5305
2.92273								0.836366								2.92273
0.664379								1.0248								0.664379
1.26767								9.77472								1.26767
0.730677								1.0712								0.730677
0.324545								0.648737								0.324545
0.453716								0.379538								0.453716
2.98373								0.492039								2.98373
2.50238								1.42811								2.50238
0.361275								5.44955								0.361275
3.29642								7.17057								3.29642
1.04726								0.310461								1.04726
0.691858								1.03177								0.691858
0.70776								0.846899								0.70776
0.903135								0.697685								0.903135
1.03722								16.8295								1.03722
0.611507								0.72326								0.611507
0.744558								8.18834								0.744558
1.4967								0.644039								1.4967
1.00974								1.17159								1.00974
0.375337								1.3419								0.375337
0.839118								0.408607								0.839118
0.333676								2.45109								0.333676
1.16449								2.9921								1.16449
1.88929								0.462962								1.88929
2.2446								1.71214								2.2446
2.87118								1.57159								2.87118
1.36084								3.29429								1.36084
6.30015								23.8238								6.30015
9.53713																9.53713
11.6706																11.6706
3.32809																3.32809
0.987232																0.987232
1.12807																1.12807
0.518547																0.518547
2.31405																2.31405
0.383569																0.383569
4.90987																4.90987
0.666331																0.666331
1.25548																1.25548
0.678548																0.678548
0.479491																0.479491
0.888472																0.888472
0.741476																0.741476
1.22556																1.22556
5.29982																5.29982
1.07449																1.07449
1.09681																1.09681
4.79351																4.79351
0.479397																0.479397
2.34389																2.34389
1.84488																1.84488
1.78446																1.78446
0.542974																0.542974
0.554036																0.554036
1.1298																1.1298
2.36887																2.36887
1.27551																1.27551
2.37703																2.37703
0.730677																0.730677
0.504124																0.504124
0.732534																0.732534
0.597798																0.597798
0.730677																0.730677
1.05774																1.05774
0.498586																0.498586
																0.423559
																0.247364
																0.568666
																0.948777
																0.479397
																1.4278
																1.22434
																0.47874
																10.7063
																0.51992
																3.25523
																0.298332
																2.26113
																0.205429
																0.920694
																0.330359
																0.614598
																0.542689
																2.04201
																0.873883
																0.801352
																0.370469
																0.670983
																0.771747
																0.96208
																2.83549
																0.136327
																3.07005
																1.25692
																0.738157
																2.23159
																1.01989
																1.05995
																2.2101
																2.4116
																3.92873
																0.763694
																1.39805
																3.19801
																0.682762
																1.36609
																16.729
																0.543984
																0.427146
																2.07737
																1.41361
																0.546153
																1.22788
																2.32387
																0.709914
																0.405963
																14.2584
																9.75291
																3.93419
																0.944516
																20.1507
																0.873034
																1.08015
																1.16056
																0.340912
																1.1109
																0.610853
																1.02077
																4.27943
																0.750832
																1.15766
																3.90912
																0.800257
																4.85239
																0.887994
																0.409526
																0.547488
																0.445322
																0.820813
																0.864757
																1.0449
																0.545685
																0.670983
																0.522137
																0.648526
																0.805401
																0.538576
																0.47799
																3.52034
																0.682058
																0.518574
																3.052
																1.2967
																0.709594
																0.967965
																1.33665
																1.04085
																0.706839
																1.12107
																1.81409
																1.72765
																0.547842
																0.534938
																0.438383
																1.05328
																0.351461
																0.855723
																0.495762
																0.605149
																1.15318
																11.6426
																0.954352
																1.39815
																0.901631
																0.702377
																0.410858
																1.79181
																0.758216
																0.842851
																1.00276
																0.809517
																0.632306
																2.03336
																0.537084
																6.72126
																0.616005
																2.50545
																1.63987
																0.608699
																0.527048
																0.90648
																0.316265
																0.442817
																1.39085
																2.29144
																0.760987
																1.98527
																0.648846
																2.58579
																13.4468
																0.702622
																2.36287
																0.850704
																0.364256
																1.92246
																1.50836
																2.36208
																0.884071
																3.08361
																1.1616
																0.491471
																0.621848
																1.78428
																1.7435
																0.609353
																1.97582
																1.43266
																0.47874
																12.2112
																0.702639
																0.319039
																0.286759
																0.5843
																0.78754
																1.64244
																0.651687
																0.38784
																1.74373
																0.641709
																0.702622
																0.402056
																0.638999
																2.85232
																1.76628
																2.81403
																1.84444
																5.38184
																2.62268
																0.546903
																0.620283
																0.250257
																0.412376
																1.05915
																0.915651
																0.888969
																0.941963
																1.03876
																0.866487
																1.02421
																0.510169
																6.72044
																6.36578
																1.96116
																1.13529
																0.836366
																1.0248
																9.77472
																1.0712
																0.648737
																0.379538
																0.492039
																1.42811
																5.44955
																7.17057
																0.310461
																1.03177
																0.846899
																0.697685
																16.8295
																0.72326
																8.18834
																0.644039
																1.17159
																1.3419
																0.408607
																2.45109
																2.9921
																0.462962
																1.71214
																1.57159
																3.29429
																23.8238
																1.91704
																2.20943
																2.50936
																0.736322
																0.976821
																2.72021
																0.885569
																2.46083
																1.12529
																1.09315
																0.578943
																0.768829
																0.798793
																0.407798
																0.674171
																1.60895
																0.448753
																0.727623
																0.876965
																1.14999
																0.945691
																3.69328
																2.22093
																1.75911
																0.720231
																0.564035
																0.500771
																1.29091
																2.54383
																1.14161
																2.42804
																0.889598
																0.748769
																7.44683
																4.33892
																1.51003
																1.81071
																0.659274
																0.858651
																1.18624
																1.53285
																0.527695
																3.83163
																2.55551
																0.954014
																0.814407
																7.33396
																0.877246
																0.2532
																4.49351
																0.334184
																0.806187
																1.48062
																0.532614
																1.53067
																0.499019
																0.960535
																1.08251
																6.93705
																1.07176
																0.957657
																0.266489
																0.864757
																0.841985
																0.761456
																1.7041
																2.67339
																4.17936
