# Supplementary material for: A non-linear system patterns Rab5 GTPase on the membrane
Source: eLife. 2020 Jun 8;9:e54434. doi: 10.7554/eLife.54434 (PMC7279886; doi:10.7554/eLife.54434)
Supplement: Table 3—source data 1. [file elife-54434-table3-data1.xlsx]

## Sheet: RbRx_inside_outside
Rabaptin-Rabex intensity																		dom int - domain intensity per domain				<dom int> - mean domain intensity per bead
Rabaptin-Rabex titration experiment										RbRx titration 100nM				RbRx full-length				Rabaptin-Rabex titration experiment
50nM			100nM			500 nM				domain area	mean	median		domain area	mean	median		50nM					100nM					500nM
dom_int	<dom_int>	dom_out	dom_int	<dom_int>	dom_out	dom_int	<dom_int>	dom_out		0.423559	1.97359	0.880938		1.33665	2.05476	0.954352		#dom/bead	domain area	dom int	<dom int>	out dom int	#dom/bead	domain area	dom int	<dom int>	out dom int	#dom/bead	domain area	dom int	<dom int>	out dom int
1929.73	2729.3	1526.24	4932.08	5903.29	4097.95	3672.61	4621.3	3434.98		0.247364				1.04085				9	0.793181	248.543	284.02	146.565	13	0.423559	2609.21	3101.78	1582.61	8	0.441105	870.365	985.58	440.637
1292.25	1529.81	1365.5	4150.92	3843.88	2022.57	4014.62	4888.58	3926.05		0.568666	stdleft	1quartile		0.706839	stdleft	1quartile		1	0.372561	251.347	212.727	141.206	2	0.247364	2626.8	2650.29	327.515	4	0.887722	853.662	1048.32	439.749
2355.33	3016.85	1804.85	4389.96	3420.36	2271.54	4014.12	4689.84	3925.33		0.948777	1.2635	0.546487		1.12107	1.2256	0.621065		5	0.836931	267.778	266.304	162.564	5	0.568666	2382.05	1929.11	500.67	10	0.473495	886.675	1866.63	877.379
2520.1	1907.12	1217.78	4583.71	2182.67	1821.31	4339.92	6648.06	3723.05		0.479397				1.81409				5	1.21121	253.889	286.556	137.425	1	0.948777	2467.61	760.588	227.824	2	0.123682	808.619	2400.62	708.878
2915.79	2792.59	1475.2	4700.89	3144.53	2099.55	4493.38	6911.05	5462.66		1.4278	stdright	3quartile		1.72765	stdright	3quartile		4	1.09174	236.627	289.77	155.037	4	0.479397	2751.24	1186.63	311.361	13	0.657235	913.424	2085.87	1191.95
3065.46	3253.09	2458.37	5310.54	7745.99	2641.59	4839.41	6416.83	4652.33		1.22434	6.2183	1.88846		0.547842	7.0885	1.80295		21	2.43867	357.332	288.942	189.057	1	1.4278	2506.87	3705.95	734.399	2	1.12688	1020.78	4837.53	843.956
2022.67	1946.51	1443.93	4119.67	6816.69	3188.97	4745.73	5491.47	4263.06		0.47874				0.534938				9	0.542689	269.122	276.785	168.612	2	1.22434	2689.83	4511.71	1079.31	7	0.850655	963.745	1328.25	427.411
3158.52	1453.14	1018.24	5940.5	4667.46	3768.91	4975.82	5139.25	3892.17		10.7063				0.438383				4	3.27884	271.966	295.245	156.282	14	0.47874	3545.14	4247.79	2142.49	7	1.43443	1047.85	1567.85	742.022
2861.85	2136.28	1517.28	6185.75	5401.45	3658.69	4147.04	4756.13	3825.03		0.51992				1.05328				6	1.25208	335.366	246.883	163.319	8	10.7063	3177.91	3338.98	1324.18	4	0.80182	969.778	3092.19	872.511
1476.72	2548.58	1166.48	5670.69	7461.74	4864.66	4366.99	5695.45	4229.1		3.25523				0.351461				1	0.530106	217.767	1024.84	172.67	7	0.51992	3028.72	3687.08	1553.25	7	1.75315	930.329	1114.74	565.052
3114.92	1834.68	1181.91	6387.31	2110.9	1970.05	4768.61	12591.6	3851.26		0.298332				0.855723				14	14.9351	269.548	372.792	206.295	1	3.25523	3212.29	3172.75	385.322	2	0.684169	1057.56	1765.81	481.75
2198.46	1053.51	869.733	6233.33	4055.12	2197.33	5016.04	4919.24	4111.33		2.26113				0.495762				1	1.28811	256.369	262.775	128.697	2	0.298332	2909.34	1836.43	354.138	14	0.311351	1014.07	1742.84	1013.43
2378.23	1742.18	1108.45	6136.44	3812.94	2958.57	4075.58	4503.16	3656.38		0.205429				0.605149				2	0.45815	259.145	290.442	145.829	12	2.26113	3103.59	2391.66	1242.08	15	0.743988	1699.76	1752.04	868.499
2557.54	2196.65	1612.94	2856.51	2463.42	1865.14	4087.57	3793.13	3829.63		0.920694				1.15318				14	1.22761	262.369	237.34	149.942	8	0.205429	2086.9	1070.53	362.105	4	0.629138	1811.71	528.496	311.929
2984.02			4064.18	3594.22	2254.44	4086.92				0.330359				11.6426					1.63491	243.409			7	0.920694	2776	2289.52	805.878		0.441105	1621.52
1067.6			3778.72	6461.35	2922.96	4428.04				0.614598				0.954352					0.622153	236.338			3	0.330359	1948.14	3581.77	766.422		0.338758	1721.56
1346.2			2975.28			4308.29				0.542689				1.39815					1.53253	270.705				0.614598	1764.53				0.410295	1899.62
1985.89			3629.93			4662.53				2.04201				0.901631					5.25839	280.542				0.542689	1711				2.10822	2036.87
2231.39			3702.33			5082.9				0.873883				0.702377					1.60513	310.64				2.04201	2096.27				1.86236	1947.74
2137.9			2872.76			5024.48				0.801352				0.410858					2.33812	326.277				0.873883	1904.4				0.593076	2250.01
1766.89			2153.15			4856.73				0.370469				1.79181					0.601465	230.834				0.801352	759.865				2.65193	1903.58
3104.14			2114.17			5107.74				0.670983				0.758216					3.81431	358.159				0.370469	1192.47				0.108714	1740.2
2304.83			2958.92			5768.64				0.771747				0.842851					0.423889	231.136				0.670983	1100.34				3.85463	2731.68
3017.1			3594.18			6869.72				0.96208				1.00276					2.11489	237.869				0.771747	1140.59				6.55981	2241.2
3702.52			3396.46			7546.67				2.83549				0.809517					3.54015	306.607				0.96208	1313.43				1.02847	1968.78
2962.56			7745.99			5542.5				0.136327				0.632306					2.92279	256.6				2.83549	3705.95				0.627962	1950.16
3616.75			5043.87			6843.13				3.07005				2.03336					1.45897	282.013				0.136327	3671.35				0.536724	1836.9
3872.84			6939.97			7061.83				1.25692				0.537084					0.805401	290.294				3.07005	4553.65				6.11483	2355.76
4460.02			6394.02			6288.16				0.738157				6.72126					4.3655	377.974				1.25692	3801.2				4.30059	2059.38
3493.43			4394.49			6403.1				2.23159				0.616005					4.83237	310.135				0.738157	3425.8				0.680796	1828.45
1828.78			4863.61			6378.39				1.01989				2.50545					0.480146	254.465				2.23159	4608.38				1.08697	2053.69
2245.17			4349.63			6302.84				1.05995				1.63987					0.987202	265.451				1.01989	3596.01				0.876965	1770.89
2552.81			3929			6925.03				2.2101				0.608699					0.492337	259.905				1.05995	4310.23				0.864757	1881.87
2538.52			3673.74			7943				2.4116				0.527048					4.1729	272.557				2.2101	4084.43				0.476238	1927.19
2662.26			3991.94			7518.36				3.92873				0.90648					1.11395	281.449				2.4116	4204.04				1.1602	1952.72
2652.58			4277.35			7718.5				0.763694				0.316265					1.23688	264.128				3.92873	4192.5				0.355813	2086.79
2942.35			4025.94			7969.46				1.39805				0.442817					0.759578	279.474				0.763694	4663.09				0.445322	1916.98
2908.51			4905.14			6320.86				3.19801				1.39085					4.18896	277.702				1.39805	4560.15				2.24866	4954.67
3008.2			5032.99			6747.23				0.682762				2.29144					1.93219	284.107				3.19801	4108.86				1.40788	4877.33
3085.05			5339			5242.72				1.36609				0.760987					0.681171	285.211				0.682762	4221.89				0.67884	1219.05
3059.57			4791.81			4185.06				16.729				1.98527					2.20599	274.429				1.36609	3878.82				0.513274	1384.07
3467.03			4500.64			4524.23				0.543984				0.648846					2.51654	278.824				16.729	4228.12				0.311351	1383.41
3297.74			4460.29			5247.96				0.427146				2.58579					0.405799	266.942				0.543984	3043.61				0.889316	1324.73
3553.96			4526.9			5773.27				2.07737				13.4468					1.15617	294.991				0.427146	3266.87				0.682293	1285.22
3309.34			5107.2			4482.86				1.41361				0.702622					0.872391	257.176				2.07737	3285.47				0.543343	1321
1626.33			5343.99			5989.53				0.546153				2.36287					0.662982	233.045				1.41361	3881.1				0.634877	1412.85
1697.87			5220.66			5024.34				1.22788				0.850704					1.06483	240.423				0.546153	3096.54				0.682575	1602.97
2095.56			5524.59			5117.35				2.32387				0.364256					0.682293	250.838				1.22788	3389.69				2.44691	1804.58
1833.05			6157.19			5146.17				0.709914				1.92246					1.77394	270.921				2.32387	3530.77				0.794664	1766.16
1604.96			5554.89			4947.4				0.405963				1.50836					0.61413	281.005				0.709914	3125.23				1.67209	1248.29
1480.25			5140.36			4332.52				14.2584				2.36208					1.15954	234.466				0.405963	3230.5				1.1389	1316.56
1890.96			7431.32			4438.74				9.75291				0.884071					1.90163	333.478				14.2584	3916.47				0.0681635	1248.05
1983.03			7105.49			4501.53				3.93419				3.08361					1.1429	265.123				9.75291	3469.24				0.888941	1542.19
2183.72			7327.7			4398.71				0.944516				1.1616					0.840521	245.438				3.93419	4040.96				1.52212	2753.32
1332.9			6956.57			4934.15				20.1507				0.491471					0.886597	276.464				0.944516	3667.23				1.09278	3131.4
1794.78			7666.76			5099.33				0.873034				0.621848					1.15944	277.171				20.1507	3611.18				0.676394	3853.67
1491.78			8690.22			5166.38				1.08015				1.78428					2.17929	263.479				0.873034	3977.74				0.247364	3696.56
1136.37			1873.33			4487.23				1.16056				1.7435					1.12126	392.191				1.08015	3303.35				0.589052	1002.55
1884.12			4302.62			4373.98				0.340912				0.609353					9.30778	216.947				1.16056	1888.02				0.51633	1046.85
2201.59			3420.92			5392.46				1.1109				1.97582					6.86796	238.239				0.340912	1982.63				0.535124	1138.29
1312.47			3188.08			5441.29				0.610853				1.43266					1.91104	207.913				1.1109	2231.09				0.694919	1042.35
1357.35			3395.77			6068.1				1.02077				0.47874					0.401585	211.903				0.610853	2401.57				1.22693	1120.19
1843.54			3413.52			6200.54				4.27943				12.2112					0.43331	198.007				1.02077	2529.83				2.5845	1180.91
1562.11			3578.06			6004.28				0.750832				0.702639					1.46681	206.211				4.27943	2742.62				0.164163	1188.74
2636.37			3427.57			4655.65				1.15766				0.319039					1.24372	1088.64				0.750832	2352.93				0.408607	1371.49
951.534			3983.04			13080.3				3.90912				0.286759					0.67936	300.483				1.15766	2477.87				7.82376	1801.16
1405.12			3996.04			3963.42				0.800257				0.5843					0.269473	282.23				3.90912	2056.13				0.600455	1504.02
1164.05			3746.17			4039.14				4.85239				0.78754					0.867595	309.286				0.800257	2309.6				1.10432	1639.21
1528.26			4554.38			4059.81				0.887994				1.64244					0.613754	309.525				4.85239	2450.28				0.543984	1626.24
1785.91			2664.5			4197.01				0.409526				0.651687					2.78565	392.556				0.887994	2608.45				0.0626134	1519.28
1807.05			3165.13			4573.14				0.547488				0.38784					0.134736	299.602				0.409526	2267.45				0.602819	1882.28
1899.27			2950.83			4250.04				0.445322				1.74373					3.18337	387.633				0.547488	1956.42				3.03586	1761.63
1745.9			3046.37			4913.53				0.820813				0.641709					1.65788	323.357				0.445322	1131.03				1.41932	1875.06
1934.7			2067.91			4817.36				0.864757				0.702622					2.21478	405.543				0.820813	956.964				1.43303	1798.75
1593.06			2201.09			4633.19				1.0449				0.402056					0.125227	368.234				0.864757	1323.29				2.4384	1698.43
1766.72			1972.15			5051.73				0.545685				0.638999					2.91466	364.477				1.0449	1139.96				2.41878	1637.2
1956.45			2080.34			5291.73				0.670983				2.85232					1.44798	425.355				0.545685	935.406				1.38398	2149.01
2011.53			2465.91			5620.41				0.522137				1.76628					1.25449	316.375				0.670983	923.905				1.76278	1936.83
1766.06			2444.71			5197.43				0.648526				2.81403					0.644618	315.853				0.522137	1164.51				0.500771	1702.15
1053.51			2278.46			5642.44				0.805401				1.84444					0.468921	262.775				0.648526	1127.52				0.0509343	1714.05
1402.11			3028.85			3797.76				0.538576				5.38184					0.530103	297.158				0.805401	1995.88				0.484245	1608.06
2141.31			3152.05			3895.39				0.47799				2.62268					0.447555	293.827				0.538576	1937.3				1.21025	1867.01
2450.26			3172.12			4498.83				3.52034				0.546903					1.39752	226.823				0.47799	1909.15				0.532209	2001.09
2421.52			4041.02			3862.47				0.682058				0.620283					0.611517	205.32				3.52034	2733.43				0.617732	1856.13
2920.94			3057.22			4058.07				0.518574				0.250257					0.441105	233.835				0.682058	1882.9				0.676307	1702.6
1872.82			2959.16			4284.51				3.052				0.412376					2.24026	239.128				0.518574	1900.62				2.26039	1636.15
1719.15			3731.46			4009.65				1.2967				1.05915					1.13326	209.413				3.052	2329.52				2.01407	1606.41
1800.27			4812.65			4417.44				0.709594				0.915651					0.549521	207.518				1.2967	3564.12				0.68445	1775.05
1903.85			8239.78			4532.2				0.967965				0.888969					2.00478	251.87				0.709594	4289.2				1.63659	2004.92
1574.45			7269.79			4431.32								0.941963					0.435033	210.548				0.967965	3088.06				4.9681	1661.89
1764.36						4515.85								1.03876					0.632306	214.837									0.463062	1572.99
2021.08						4861.85								0.866487					0.733188	219.846									1.5606	1934.09
2212.53						4573								1.02421					1.48989	229.272									0.564551	1613.68
2239.86						4554.48								0.510169					3.18962	248.513									0.989298	1630.05
2450.08						4977.94								6.72044					0.656219	223.949									1.50081	1875.87
2116.72						3493.19								6.36578					0.430403	217.045									0.318384	488.822
						3730.28								1.96116															2.66279	537.336
						3792.46								1.13529															3.5942	532.326
						3975.47								0.836366															1.68227	526.472
														1.0248
														9.77472
														1.0712
														0.648737
														0.379538
														0.492039
														1.42811
														5.44955
														7.17057
														0.310461
														1.03177
														0.846899
														0.697685
														16.8295
														0.72326
														8.18834
														0.644039
														1.17159
														1.3419
														0.408607
														2.45109
														2.9921
														0.462962
														1.71214
														1.57159
														3.29429
														23.8238
