# Supplementary material for: A non-linear system patterns Rab5 GTPase on the membrane
Source: eLife. 2020 Jun 8;9:e54434. doi: 10.7554/eLife.54434 (PMC7279886; doi:10.7554/eLife.54434)
Supplement: Table 4—source data 1. [file elife-54434-table4-data1.xlsx]

## Sheet: Sheet1
Segm1: Reg=0.35, MOI = 0.3				intensities without background subtraction;			marching cubes for the labeled segmentation;
Rab5 intensity
EE (0% PI(3)P)					EE (1% PI(3)P)
#dom/bead	domain area	dom int	<dom int>	<out dom int>	#dom/bead	domain area	dom int	<dom int>	out dom int
2	1.2886	314.778	300.71	141.044	3	2.45817	3699.86	3274.35	337.075
7	1.70035	294.58	647.38	275.104	6	1.05229	2630.92	399.619	215.918
4	0.557943	577.674	412.784	160.162	9	1.97477	3207.46	1254.62	520.558
	0.547185	575.371			7	2.02262	398.564	854.379	415.27
	1.56674	604.872			5	0.402056	397.577	1345.7	517.526
	7.57375	663.048			1	0.478945	380.765	597.815	231.621
	0.833501	638.684			1	1.0478	389.799	855.071	213.077
	0.583144	623.567			3	0.886597	373.486	1682.03	618.093
	2.43743	709.006			2	3.04603	417.278	1089.6	340.022
	1.49288	376.931			2	0.617732	1174.22	2059.83	244.645
	0.542689	360.194			1	1.66935	1200	835.585	231.452
	7.29635	421.106			2	1.93403	1148.33	2431.22	245.767
	1.15852	448.402			5	0.820777	1270.33	1171.14	541.398
					4	0.2532	1167.14	1795.61	246.58
					5	1.29963	1605.54	1447.35	272.889
					2	0.662451	1286.65	473.859	169.897
					1	1.20542	1342.29	2540.32	277.822
					3	0.915237	1263.19	1122.02	278.836
					3	0.603657	817.016	832.566	215.737
					2	0.880244	759.561	684.5	159.298
					1	1.0223	835.613	1949.87	222.809
					5	4.35328	876.991	972.375	338.893
					5	0.402056	889.792	912.35	347.956
					5	0.363532	918.148	933.744	314.043
					1	0.408607	865.744	988.044	280.193
					6	0.779372	1216.3	895.843	337.094
					1	0.321627	1509.39	2470.61	791.18
					2	0.434694	1440.45	1543.39	525.079
					4	0.662534	1337.65	1055.7	296.845
					3	0.658947	1473.39	1335.19	526.495
					7	1.69052	601.533	1527.62	611.275
					12	0.720206	855.071	1059.96	416.406
					1	2.78445	1742.45	3110.94	426.403
					11	0.80182	1642.12	1782.31	1009.97
					1	1.73121	1613.79	1764.5	232.628
					10	0.527695	1191.12	1085.7	466.75
					4	0.679952	1073.86	2350.07	903.333
					10	0.317112	1936.8	995.406	410.01
					2	0.476771	2365.21	2649.05	558.963
					6	5.50526	854.432	1046.27	424.528
						0.82409	2212.53
						1.2832	2614.07
						1.09025	1042.88
						0.736636	1146.89
						0.752145	1054.87
						7.4402	1201.68
						0.970686	1509.11
						0.840234	1652.09
						0.791769	2022.38
						2.66138	1706.62
						0.885159	2069.82
						0.728065	1281.64
						0.342413	1244.72
						0.645147	1527.22
						1.37289	1682.95
						2.12259	1372.27
						0.528246	398.918
						0.93577	516.163
						2.39014	2664.61
						0.654362	1342.11
						1.93295	1110.33
						0.758559	1031.77
						0.872026	742.175
						0.43366	717.506
						0.741075	1058.56
						0.839435	708.425
						0.532248	581.007
						1.02386	2070.02
						1.02386	1132.21
						1.36084	858.381
						1.83051	966.824
						0.802604	1026.82
						0.527695	1036.23
						0.547279	808.698
						2.50646	1052.61
						0.617164	935.992
						0.901843	858.919
						1.85845	857.285
						2.92098	1028.35
						0.468921	898.661
						0.781446	786.243
						0.57825	882.171
						0.478945	861.992
						1.55293	988.044
						0.47676	859.587
						1.74151	775.444
						0.375337	944.07
						0.366077	839.221
						2.64121	947.49
						0.423496	880.596
						0.702622	2117.69
						1.28073	1856.79
						1.36692	1329.99
						0.382059	950.534
						0.807679	853.6
						1.51738	1211.54
						0.811286	1026.78
						2.8125	1375.75
						1.5305	1387.64
						2.92273	1289.8
						0.664379	1266.65
						1.26767	1362.68
						0.730677	1501.43
						0.324545	1375.34
						0.453716	1542.56
						2.98373	1569.72
						2.50238	1676.24
						0.361275	948.448
						3.29642	1086.11
						1.04726	995.627
						0.691858	908.604
						0.70776	1161.37
						0.903135	1106.75
						1.03722	1054.42
						0.611507	991.058
						0.744558	1029.03
						1.4967	958.207
						1.00974	955.515
						0.375337	980.969
						0.839118	3095.58
						0.333676	1516.27
						1.16449	1679.63
						1.88929	1434.24
						2.2446	1696.95
						2.87118	1624.91
						1.36084	1757.79
						6.30015	1634.88
						9.53713	1893.26
						11.6706	1976.05
						3.32809	1614.78
						0.987232	1644.78
						1.12807	1899.48
						0.518547	1001.42
						2.31405	1153.53
						0.383569	1149.37
						4.90987	1146.91
						0.666331	1027.44
						1.25548	892.086
						0.678548	1083.63
						0.479491	943.836
						0.888472	1015.68
						0.741476	1049.68
						1.22556	1920.23
						5.29982	2491.05
						1.07449	2649.03
						1.09681	2004.76
						4.79351	1066.63
						0.479397	894.585
						2.34389	1044.48
						1.84488	947.92
						1.78446	1062.66
						0.542974	1034.07
						0.554036	988.207
						1.1298	778.595
						2.36887	934.58
						1.27551	1008.53
						2.37703	2522.03
						0.730677	2086.5
						0.504124	1047.35
						0.732534	1040.37
						0.597798	1015.16
						0.730677	1034.01
						1.05774	1063.52
						0.498586	1051.98
