# Supplementary material for: A non-linear system patterns Rab5 GTPase on the membrane
Source: eLife. 2020 Jun 8;9:e54434. doi: 10.7554/eLife.54434 (PMC7279886; doi:10.7554/eLife.54434)
Supplement: Table 5—source data 1. [file elife-54434-table5-data1.xlsx]

## Sheet: 2020 Lipid Variation
updated: 01.04.2020
	PCPSCH							PlasmPE							SM							EE
#beads	#dom/bead	domain area	dom int	<dom int>	out dom int		#beads	#dom/bead	domain area	dom int	<dom int>	out dom int		#beads	#dom/bead	domain area	dom int	<dom int>	out dom int		#beads	#dom/bead	domain area	dom int	<dom int>	out dom int
30	16	0.795678	268.278	264.16	208.253		21	6	1.21224	333.504	328.703	214.766		25	2	1.20566	351.857	331.202	152.549		32	8	2.29494	937.92	700.477	402.133
	2	2.08586	249.023	424.862	220.054			1	4.18278	337.247	429.386	207.464			4	0.579963	288.263	314.273	159.526			5	1.31421	626.756	641.922	318.934
	11	2.1012	287.956	223.121	160.059			13	3.43006	329.2	701.208	487.955			1	2.03032	319.541	923.213	210.215			4	1.63666	615.501	483.977	238.174
	8	0.615724	255.021	200.8	146.57			2	1.15813	314.596	728.099	156.685			9	1.28867	300.834	632.613	321.12			3	1.61144	683.616	1168.44	803.582
	6	0.273217	329.161	531.832	347.874			1	0.680873	316.547	522.143	142.718			2	1.78639	307.534	1020.19	223.715			5	3.53798	682.95	685.527	394.455
	1	0.733188	256.247	368.105	197.898			2	1.27722	314.1	794.107	179.701			5	0.841985	336.436	488.868	263.653			3	1.08789	631.928	1168.5	338.738
	2	1.82691	251.643	437.913	150.898			8	0.918693	429.386	300.709	190.886			1	0.679952	923.213	710.403	193.272			1	1.34959	682.582	991.341	510.408
	10	0.601465	262.731	429.673	248.376			2	1.32036	578.815	356.802	182.697			3	3.66323	664.328	747.81	155.205			1	1.30308	607.583	851.72	694.733
	1	9.26592	277.462	546.55	209.36			2	0.335676	622.06	299.744	139.351			6	3.91792	613.015	1040.41	341.903			7	0.614598	635.866	999.443	683.533
	4	11.427	270.183	444.913	250.478			6	2.68646	597.681	241.638	167.035			1	1.68184	578.522	1138.96	649.029			3	1.43191	647.453	1826.86	729.987
	1	2.06128	272.632	323.749	137.631			2	2.33417	582.596	500.811	162.973			11	0.202431	515.83	424.112	256.313			3	0.589169	728.711	1744.9	291.443
	3	2.95088	263.493	197.699	143.657			9	0.885569	675.467	293.526	193.276			3	0.47874	648.278	947.085	389.891			6	1.56123	589.22	1065.53	725.193
	1	1.81683	267.372	718.971	187.645			11	1.09371	715.885	279.526	209.325			3	0.888472	590.568	424.12	190.022			11	1.21788	664.051	1626.8	1100.13
	14	0.0532647	215.415	185.627	142.687			13	0.546903	674.732	246.325	159.896			2	1.14859	605.848	490.703	176.978			9	6.52986	429.494	937.96	682.41
		14.2234	249.819						2.99304	726.904					1	1.14934	718.884	1604.98	373.698			2	2.95422	540.729	740.886	504.364
		0.319296	229.298						3.57972	689.123					8	1.40358	658.735	320.975	176.516			6	0.564035	517.141	839.122	602.595
		1.24287	372.367						9.40601	773.08					3	0.468921	926.466	731.23	285.544			2	2.84197	543.583	782.242	384.964
		1.10437	483.941						6.0721	700.363					2	0.82407	1073.53	770.488	335.902			6	0.499019	1127.63	822.892	601.963
		0.225861	191.82						6.88572	675.078					3	1.15027	451.609	1672.44	297.145			7	1.5809	1193.8	744.092	525.06
		2.65587	235.343						3.23487	775.317					11	0.996499	494.646	1435.08	802.995			7	0.372561	1115.47	755.07	443.218
		1.29007	222.911						1.22901	758.359					2	0.993387	478.026	716.468	192.102			6	1.24187	675.153	737.944	437.437
		5.10592	229.667						1.24366	698.195					4	0.595287	477.798	772.041	312.29			11	3.29338	704.285	668.308	482.387
		2.2183	211.097						1.22395	522.143						1.18111	534.976					9	1.00612	677.927	725.54	568.088
		4.3915	223.934						0.713921	807.103						0.73023	710.403					7	3.96379	760.294	719.832	548.788
		0.522137	207.53						0.488214	775.102						1.15691	779.995					5	8.4387	645.521	748.311	525.35
		1.34587	231.48						0.678801	334.208						0.334184	675.507					11	0.750738	1215.35	538.456	365.019
		0.6337	222.417						0.338758	304.441						0.197591	681.644					6	2.38789	1123.33	506.722	327.645
		1.5156	211.791						1.53752	288.957						7.00323	1081.5					1	1.26381	1226.03	1191.58	553.796
		2.59589	215.054						0.390749	323.287						0.739146	838.483					5	1.21704	991.341	675.088	443.721
		0.750832	178.656						8.28814	305.088						15.2703	1039.95					3	4.26747	851.72	678.985	357.033
		3.8571	195.241						1.71647	285.945						0.478945	937.409						1.86368	1036.84
		2.08581	198.825						1.42567	298.847						2.06843	946.621						2.3186	1089.06
		3.76863	195.604						4.98258	296.082						3.79215	1069.91						3.04212	984.981
		0.558376	189.145						1.22367	381.579						5.93095	1138.96						0.176194	959.793
		1.97986	207.357						0.60334	306.55						1.06904	380.031						0.535595	1066.22
		10.9252	205.007						1.47978	329.169						1.29989	419.337						0.51077	1070.04
		11.112	201.641						0.851594	248.615						8.76171	403.284						1.16185	742.671
		0.205147	498.653						1.07295	241.843						2.44773	398.933						0.929942	1658.89
		1.77479	502.711						2.0881	241.507						15.6168	459.959						0.818527	1646.54
		2.01441	556.071						0.48137	229.043						3.5939	397.441						5.53444	1881.75
		0.58387	614.081						3.23047	254.668						0.739146	388.627						3.27177	1838.92
		0.613754	509.312						3.36815	238.413						0.247364	421.127						0.668004	1478.56
		1.93414	519.146						2.5234	231.685						0.51077	398.896						0.272877	1269.59
		0.665493	368.105						0.616005	441.729						2.20532	407.107						0.164163	860.91
		0.957761	411.84						1.01427	536.693						1.79517	374.449						0.116838	794.151
		1.0809	461.016						1.95224	341.387						0.402056	779.881						0.700388	976.936
		0.765593	396.404						5.5243	287.326						10.2043	963.142						6.41442	1115.05
		0.762654	426.902						0.881043	309.369						1.21278	867.416						1.22508	1015.48
		0.407203	390.717						1.27316	270.782						0.682293	351.181						2.33932	1010.38
		0.746993	424.396						3.214	291.878						1.91787	442.355						1.68411	1337.07
		4.59031	432.204						3.52399	320.067						0.970686	439.362						0.58475	1241.79
		2.11308	442.777						3.09592	261.416						0.538852	426.112						3.02454	1421.16
		2.07025	441.442						0.475648	304.513						0.972792	526.481						2.65578	1696.88
		4.46235	422.032						5.0693	285.986						1.00558	1604.98						0.887815	1485.14
		0.999614	391.486						0.312597	282.77						1.28752	372.444						0.957479	1758.84
		4.13501	443.211						0.225861	271.443						0.576218	329.401						1.32691	1796.39
		0.270693	546.55						1.33808	275.35						0.822525	321.206						2.08551	1944.48
		0.522137	423.809						5.15515	293.186						2.58071	295.671						0.486502	1590.05
		0.939864	468.627						4.38883	259.404						0.2532	303.747						7.38382	1658.38
		5.6466	434.16						5.0287	263.023						0.955417	318.225						1.58279	1655.5
		0.819277	505.273						1.76207	290.684						1.13862	323.427						1.47821	881.996
		5.75211	323.749						0.738127	275.711						3.42066	320.445						2.07797	1020.7
		1.26729	189.441						0.665493	290.909						2.38189	672.753						0.195374	972.211
		2.67215	196.672						18.0436	283.008						1.07865	838.114						2.07074	916.453
		2.13005	203.901						1.28817	295.067						0.563006	773.847						0.660822	1030.34
		0.622362	718.971						1.49792	239.602						1.17303	810.48						0.600476	959.275
		1.08963	171.984						1.83136	277.167						1.77896	744.118						1.00711	896.874
		0.212913	193.413						1.19602	238.926						0.341756	1456.37						0.709169	818.713
		1.31104	176.686						0.965748	221.433						1.01224	1563.25						0.542974	939.34
		4.72506	168.952						1.03018	249.723						2.46081	1747.36						0.515976	721.319
		1.17405	194.053						1.61018	225.655						5.89076	1440.06						0.350194	769.716
		0.683137	176.859						0.476238	229.682						6.72239	1653.06						0.49868	675.51
		1.36834	165.432						0.658947	244.613						2.24239	1233.65						2.18374	754.481
		1.57039	181.344						0.648737	232.8						2.71281	1352.13						0.748397	761.938
		0.408607	189.713						0.767284	237.658						2.63286	1583.18						0.836931	803.931
		0.200286	186.426						0.908046	276.688						4.74295	1339.6						9.1019	878.335
		6.97838	194.424						1.17554	253.379						2.42179	1098.37						0.164163	819.166
		1.21193	165.425						2.41256	248.346						1.14899	1180.15						2.87172	850.797
		0.0554492	217.27													0.910617	1766.89						1.66186	663.778
		12.5924	193.068													0.808801	1258.97						3.46081	601.043
																2.04407	1529.73						3.88135	788.451
																0.811286	732.88						2.58583	709.549
																0.918635	701.973						11.8478	884.204
																0.555119	698.496						4.03415	944.006
																0.806187	708.718						5.82209	819.377
																1.13862	847.018						4.26985	780.884
																0.318384	792.473						6.99237	669.134
																							2.84783	687.764
																							5.83657	788.875
																							0.394164	632.037
																							1.16449	641.864
																							9.54317	789.074
																							0.841985	607.826
																							0.342131	665.142
																							2.84634	666.717
																							1.86133	655.851
																							0.98633	735.26
																							9.91904	828.747
																							3.49244	720.605
																							1.07449	790.722
																							1.14899	660.805
																							2.91487	652.743
																							1.4743	791.413
																							2.02139	826.784
																							0.793803	765.484
																							0.445322	530.572
																							1.14357	619.407
																							3.26316	687.101
																							1.73765	604.025
																							2.72216	594.193
																							1.81791	673.049
																							2.36831	640.61
																							7.1966	655.512
																							3.21663	647.933
																							4.3141	752.27
																							4.92854	713.306
																							0.745528	602.212
																							4.35264	691.021
																							0.941777	691.502
																							4.66927	690.44
																							0.205053	729.586
																							2.37826	794.725
																							2.27648	814.026
																							5.64764	732.307
																							0.840996	764.92
																							0.44344	793.363
																							2.7505	650.84
																							4.54604	706.357
																							1.1471	715.412
																							2.17154	770.002
																							7.85996	712.977
																							3.36983	769.807
																							1.29091	552.091
																							0.191784	603.751
																							2.39753	695.999
																							10.0157	807.532
																							4.94313	710.541
																							9.65468	628.249
																							0.526068	527.269
																							0.233676	438.526
																							0.170412	505.282
																							1.06117	489.472
																							2.98091	460.884
																							2.55205	447.647
																							2.68054	479.718
																							3.047	497.404
																							3.00614	545.017
																							5.86792	529.212
																							2.22702	519.812
																							0.693375	459.243
																							1.22348	460.816
																							3.23957	472.068
																							9.41913	494.87
																							5.5741	557.643
																							1.79208	1191.58
																							1.7688	607.738
																							0.585104	794.619
																							2.36795	668.813
																							2.55362	777.155
																							2.73575	603.226
																							0.944516	477.692
																							0.884071	538.056
																							9.21626	713.133
